# Supplementary material for: PPARγ Regulates Triclosan Induced Placental Dysfunction
Source: MDPI journal article supplement (doi:10.3390/cells11010086), 2021-12-28
Supplement: s1 [file s1]

Supplementary Figure S1.

Figure S1

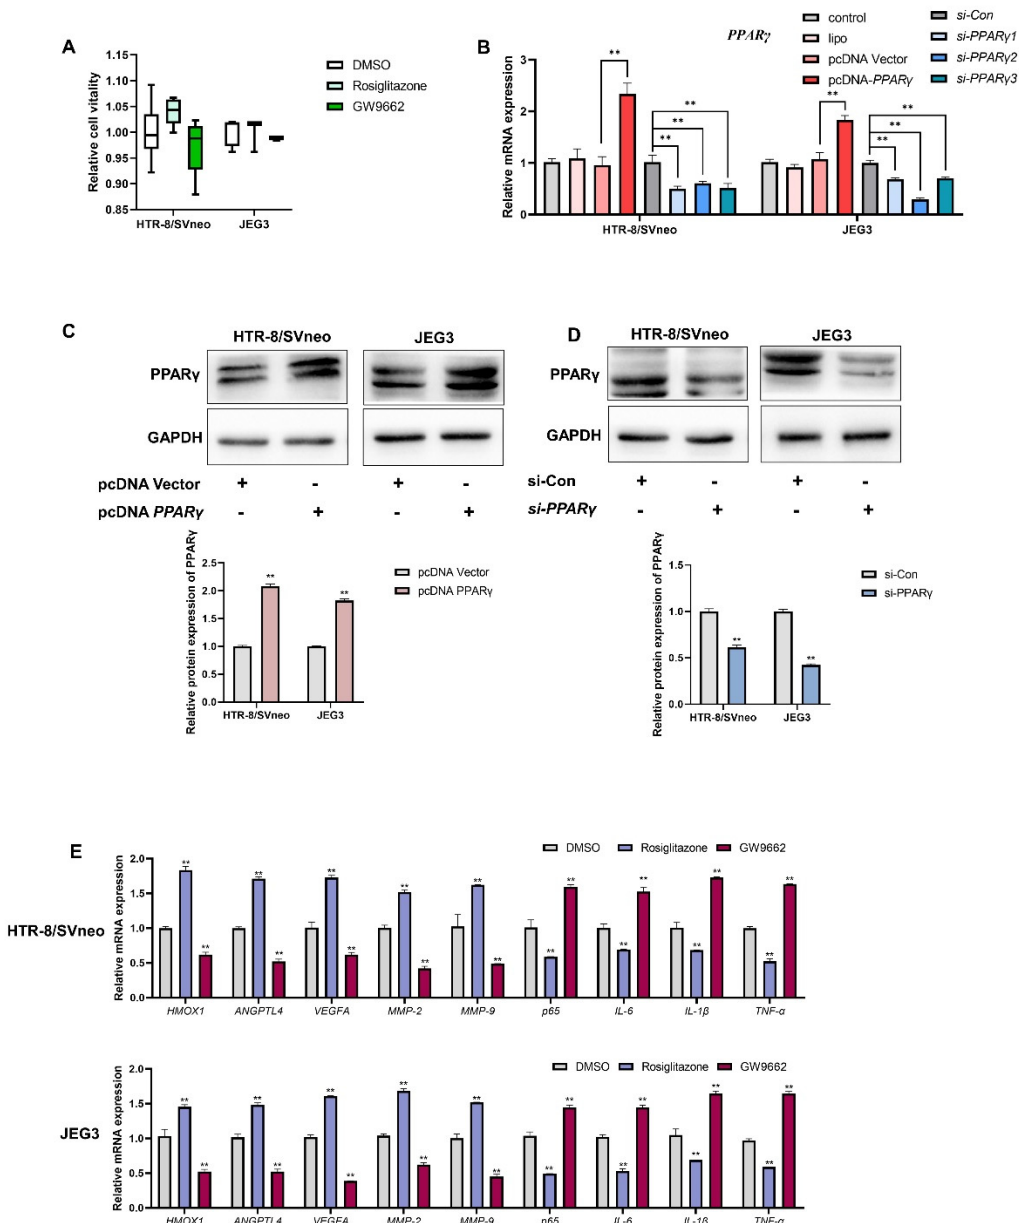

**Supplementary Figure S1.** (A) Cell vitalities were detected by CCK-8 assay when exposed to rosiglitazone and GW9662 in HTR-8/SVneo and JEG-3 cells. (B) PPAR- $\gamma$ -pcDNA and si-PPAR $\gamma$  were transfected into cells and transfection efficiency were detected by RT-PCR. RNA was isolated from cells and then RT-PCR was used to evaluate the transcription of PPAR $\gamma$ . pcDNA-PPAR $\gamma$  (C) and si-PPAR $\gamma$  (D) were

transfected into cells and transfection efficiency were detected by western blot. Protein was isolated from cells and then western blot was used to evaluate the transcription of PPAR- $\gamma$ . (E) The mRNA expression of PPAR $\gamma$  regulated genes were analyzed by RT-PCR in the absence or presence of rosiglitazone or GW9662 for 24 h in HTR-8/SVneo and JEG-3 cells. The data are shown as the means  $\pm$  S.E.M. \*P < 0.05; \*\* P < 0.01; compared with the indicated group, n=3.

**Supplementary Table S1. RT-PCR primers**

| Gene symbol                     | Forward primer         | Reverse primer          |
|---------------------------------|------------------------|-------------------------|
| <i>hGAPDH</i>                   | GGAAATCCCATCACCATCT    | GGACTCCACGACGTACTCA     |
| <i>hANGPTL4</i>                 | CTCAAGGCTCAGAACAGCAGG  | TGGTCCAGGAGGCCAAACT     |
| <i>hHMOX1</i>                   | CAGCGGGCCAGCAACAAAG    | ACCCATCGGAGAAGCGGAGC    |
| <i>hVEGFA</i>                   | AGGGCAGAATCATCACGAAG   | GAAGATGTCCACCAGGGTCTC   |
| <i>hMMP-2</i>                   | CTTCCAGGGCACATCCTAT    | CCTTCTGAGTTCCCAACAA     |
| <i>hMMP-9</i>                   | TCCCTGGAGACCTGAGAACC   | GCCACCCGAGTGTAACCAT     |
| <i>hp65</i>                     | GGGGACTIONGACCTGAATGCT | GTCAAAGATGGGATGAGAAAGGA |
| <i>hTNF-<math>\alpha</math></i> | TGAAAGCATGATCCGGGACG   | AGGCAGAAGAGCGTGGTGGC    |
| <i>hIL-6</i>                    | CAAATTCGGTACATCCTCG    | TTTCTGCCAGTGCCTCTTT     |
| <i>hIL-1<math>\beta</math></i>  | ATGGCTTATTACAGTGGCA    | GTAAGTGGTGGTCCGAGATT    |
| <i>mGapdh</i>                   | TCTTGGGCTACACTGAGGA    | ATACCAGGAAATGAGCTTGA    |
| <i>mAngptl4</i>                 | ATCACAGGGAACCGAGGAA    | ATTGGAGCAATTTGGCATT     |
| <i>mHmox1</i>                   | GGTGATGGCTTCCTTGATAC   | AGACTGGGTTCTGCTTGTT     |
| <i>mVegfa</i>                   | GCACCCACGACAGAAGGAG    | TCAATCGGACGGCAGTAGC     |
| <i>mMmp-2</i>                   | TGTCCCGAGACCGCTATGT    | TTGCCCAGGAAAGTGAAGG     |
| <i>mMmp-9</i>                   | ACAGCCAACTATGACCAGGAT  | TTGCCCAGGAAGACGAAGG     |
| <i>mp65</i>                     | TGCGATTCCGCTATAAATG    | TTGGTGGTATCTGTGCTTCTC   |
| <i>mTnf-<math>\alpha</math></i> | TCTCATTCCTGCTTGTTGGC   | GGAACCTCTCATCCCTTTGG    |
| <i>mIl-6</i>                    | CTTCTTGGGACTGATGCTG    | GGTCTGTTGGGAGTGGTAT     |
| <i>mIl-1<math>\beta</math></i>  | TGAAGGGCTGCTTCCAAAC    | GATGTGCTGCTGCGAGATT     |
